# Supplementary material
Source: PubMed Central journal article supplement (PMC5006922)
Supplement: koni-05-07-1197458-s001.pdf [file koni-05-07-1197458-s001.pdf]

| Module 1 - Sample                        |                                     |                                     |                                                                                               |
|------------------------------------------|-------------------------------------|-------------------------------------|-----------------------------------------------------------------------------------------------|
| Module 1A - Donor                        |                                     |                                     |                                                                                               |
| Required                                 | If Available                        | Optional                            |                                                                                               |
| <input checked="" type="checkbox"/>      |                                     |                                     | Essential donor info <i>DISCUSSED with Sylvia Jawetzki</i>                                    |
| Module 1B - Source                       |                                     |                                     |                                                                                               |
| <input checked="" type="checkbox"/>      |                                     |                                     | Source of cell material                                                                       |
| <input checked="" type="checkbox"/>      |                                     |                                     | Collection methodology <i>FROM Stanford Blood Bank</i>                                        |
|                                          | <input checked="" type="checkbox"/> |                                     | Anti-coagulant, if available                                                                  |
|                                          | <input checked="" type="checkbox"/> |                                     | Transportation/storage conditions for unprocessed samples, if available                       |
| <input checked="" type="checkbox"/>      |                                     |                                     | Cell processing methodology                                                                   |
|                                          | <input checked="" type="checkbox"/> |                                     | Median time and ranges from sample collection until end of cell processing, if available      |
|                                          | <input checked="" type="checkbox"/> |                                     | Cut-offs, if used                                                                             |
| Module 1C - Cryopreservation and Storage |                                     |                                     |                                                                                               |
| <input checked="" type="checkbox"/>      |                                     |                                     | Fresh or cryopreserved <i>FRESH</i>                                                           |
|                                          |                                     |                                     | If cryopreserved <i>N/A</i>                                                                   |
| <input checked="" type="checkbox"/>      |                                     |                                     | Devices used <i>N/A</i>                                                                       |
| <input checked="" type="checkbox"/>      |                                     |                                     | Freezing process <i>N/A</i>                                                                   |
| <input checked="" type="checkbox"/>      |                                     |                                     | Medium used for freezing <i>N/A</i>                                                           |
|                                          | <input checked="" type="checkbox"/> |                                     | Median time and temperature for each transportation and storage step, if available <i>N/A</i> |
|                                          | <input checked="" type="checkbox"/> |                                     | Cut-offs, if used <i>N/A</i>                                                                  |
| Module 1D - Cell Counting                |                                     |                                     |                                                                                               |
| <input checked="" type="checkbox"/>      |                                     |                                     | Median cell yield and viability (when available)                                              |
|                                          | <input checked="" type="checkbox"/> |                                     | Before freezing <i>WE USED FRESH/NEAR FROZEN</i>                                              |
|                                          | <input checked="" type="checkbox"/> |                                     | After thawing <i>N/A</i>                                                                      |
|                                          | <input checked="" type="checkbox"/> |                                     | After overnight resting <i>AFTER 3 days stim</i>                                              |
|                                          | <input checked="" type="checkbox"/> |                                     | Cut-offs, if used                                                                             |
| <input checked="" type="checkbox"/>      |                                     |                                     | Cell counting methodology                                                                     |
|                                          |                                     | <input checked="" type="checkbox"/> | Additional assessments <i>Flow etc. parameters and pipelines</i>                              |

| <b>Module 2 - Assay</b>             |                                     |                 |                                                                                            |
|-------------------------------------|-------------------------------------|-----------------|--------------------------------------------------------------------------------------------|
| <b>Module 2A - Medium/Serum</b>     |                                     |                 |                                                                                            |
| <i>Required</i>                     | <i>If Available</i>                 | <i>Optional</i> |                                                                                            |
| <input checked="" type="checkbox"/> |                                     |                 | Medium/(serum) details                                                                     |
| <input checked="" type="checkbox"/> |                                     |                 | Pre-testing info                                                                           |
| <b>Module 2B - Assay</b>            |                                     |                 |                                                                                            |
|                                     | <input checked="" type="checkbox"/> |                 | Treatment procedures of cells prior to assay, if applicable                                |
| <input checked="" type="checkbox"/> |                                     |                 | Sufficient assay details                                                                   |
| <b>Module 2C - Controls</b>         |                                     |                 |                                                                                            |
| <input checked="" type="checkbox"/> |                                     |                 | Internal assay controls                                                                    |
|                                     | <input checked="" type="checkbox"/> |                 | Acceptance criteria, if available <i>EXPERIMENTS CONDUCTED IN EXPERIMENTAL SETTING N/A</i> |
|                                     | <input checked="" type="checkbox"/> |                 | External reference samples, if used <i>∴ NO OSS CRITERIA N/A</i>                           |
|                                     | <input checked="" type="checkbox"/> |                 | Assay acceptance criteria, if available <i>N/A</i>                                         |

| <b>Module 3 - Data Acquisition</b>                 |                                     |                                     |                                                                                 |
|----------------------------------------------------|-------------------------------------|-------------------------------------|---------------------------------------------------------------------------------|
| <b>Module 3A - Equipment and Software</b>          |                                     |                                     |                                                                                 |
| <i>Required</i>                                    | <i>If Available</i>                 | <i>Optional</i>                     |                                                                                 |
| <input checked="" type="checkbox"/>                |                                     |                                     | Equipment and software version                                                  |
|                                                    | <input checked="" type="checkbox"/> |                                     | Basic equipment settings, if available                                          |
| <b>Module 3B - Acquisition Strategy and Gating</b> |                                     |                                     |                                                                                 |
| <input checked="" type="checkbox"/>                |                                     |                                     | Detailed gating strategy or strategy for establishing spot detection parameters |
| <input checked="" type="checkbox"/>                |                                     |                                     | Representative data set                                                         |
|                                                    | <input checked="" type="checkbox"/> |                                     | Mean, median, ranges of event counts for relevant populations, if available     |
|                                                    |                                     | <input checked="" type="checkbox"/> | Unusual strategies explained <i>N/A</i>                                         |
|                                                    |                                     | <input checked="" type="checkbox"/> | Review of raw data <i>collected data on excel</i>                               |

| Module 4 - Results                  |                                     |                                     |                                                                                     |
|-------------------------------------|-------------------------------------|-------------------------------------|-------------------------------------------------------------------------------------|
| Module 4A - Raw Data                |                                     |                                     |                                                                                     |
| Required                            | If Available                        | Optional                            |                                                                                     |
|                                     | <input checked="" type="checkbox"/> |                                     | Background and Ag-specific reactivity levels, if available N/A                      |
|                                     | <input checked="" type="checkbox"/> |                                     | Cut-off specifications and # of tests out-of-specification, if available N/A        |
| <input checked="" type="checkbox"/> |                                     |                                     | Accessibility of raw data addressed?                                                |
| Module 4B - Response Determination  |                                     |                                     |                                                                                     |
| <input checked="" type="checkbox"/> |                                     |                                     | Definition of positive reactivity (above background) including tests applied N/A    |
|                                     | <input checked="" type="checkbox"/> |                                     | Parameters, software and version used for response determination, if applicable N/A |
| <input checked="" type="checkbox"/> |                                     |                                     | Response definition predefined or post-hoc? post-hoc                                |
|                                     | <input checked="" type="checkbox"/> |                                     | Definition of response induced by treatment, if applicable By treatment             |
|                                     | <input checked="" type="checkbox"/> |                                     | Any data excluded and why, if applicable?                                           |
|                                     |                                     | <input checked="" type="checkbox"/> | Why test was used                                                                   |

| Module 5                             |                                     |                                     |                                                                |
|--------------------------------------|-------------------------------------|-------------------------------------|----------------------------------------------------------------|
| Module 5A - General Lab Operation    |                                     |                                     |                                                                |
| Required                             | If Available                        | Optional                            |                                                                |
| <input checked="" type="checkbox"/>  |                                     |                                     | Guidance of lab operations Experimental setting                |
|                                      | <input checked="" type="checkbox"/> |                                     | Laboratory accreditations and certifications, if available N/A |
|                                      |                                     | <input checked="" type="checkbox"/> | Details on audits N/A                                          |
| Module 5B - Standardization          |                                     |                                     |                                                                |
| <input checked="" type="checkbox"/>  |                                     |                                     | Status of protocols Experimental setting                       |
| Module 5C - Qualification/Validation |                                     |                                     |                                                                |
| <input checked="" type="checkbox"/>  |                                     |                                     | Status of assays Experimental setting                          |
|                                      |                                     | <input checked="" type="checkbox"/> | Specific performance criteria N/A                              |
